# Supplementary material
Source: PubMed Central journal article supplement (PMC9923592)
Supplement: PEDS_20151283SupplementaryData.pdf [file PEDS_20151283SupplementaryData.pdf]

# Supplemental Information

**SUPPLEMENTAL TABLE 4** Database Search Strategy

| Database                         | Search                                                                                                                                                                                                                                                                                                                                                                                                                                                                                                                                                                                                                                                                                                                                                                                                                                                                                                                                                                                                               |
|----------------------------------|----------------------------------------------------------------------------------------------------------------------------------------------------------------------------------------------------------------------------------------------------------------------------------------------------------------------------------------------------------------------------------------------------------------------------------------------------------------------------------------------------------------------------------------------------------------------------------------------------------------------------------------------------------------------------------------------------------------------------------------------------------------------------------------------------------------------------------------------------------------------------------------------------------------------------------------------------------------------------------------------------------------------|
| PubMed (January 3, 2015)         | (odynophagia OR "anesthetic complications" OR aspiration OR "airway compromise" OR "atlantoaxial dislocation" OR bacteremia OR infection OR bleeding OR death OR dehydration OR distress OR edema OR "Eustachian tube injury" OR fever OR hemorrhage OR hemorrhage OR hypoxia OR infection OR "mandible dislocation" OR "nasopharyngeal insufficiency" OR nausea OR otalgia OR otitis OR pain OR pneumonia OR complications OR "psychological trauma" OR "pulmonary edema" OR "pulmonary embolism" OR "refusal to feed" OR "respiratory compromise" OR "respiratory problems" OR "tongue base edema" OR vomiting OR emesis OR "lethal outcome") AND (obstructive sleep apnea[MeSH Terms] OR "OSA" or "sleep apnea" or "sleep apnoea" or "sleep disordered breathing" or "SDB") AND ("T&A" or "AT" or adenoidectomy or tonsillectomy or tonsillotomy or "tonsil surgery" or adenotonsillectomy) AND Search (children OR child OR childhood OR pediatric OR pediatric OR adolescent OR adolescents OR "young patient") |
| Cochrane (January 3, 2015)       | (children or child or childhood or pediatric or pediatric or adolescent or adolescents or "young patient") AND ("T&A" or "AT" or adenoidectomy or tonsillectomy or tonsillotomy or "tonsil surgery" or adenotonsillectomy) AND ("OSA" or "sleep apnea" or "sleep apnoea" or "sleep disordered breathing" or "SDB") AND ((odynophagia or "anesthetic complications" or aspiration or "airway compromise" or "atlantoaxial dislocation" or bacteremia or infection or bleeding or death or dehydration or distress or edema or "Eustachian tube injury" or fever or hemorrhage or hemorrhage or hypoxia or infection or "mandible dislocation" or "nasopharyngeal insufficiency") OR nausea or otalgia or otitis or pain or pneumonia or complications or "psychological trauma" or "pulmonary edema" or "pulmonary embolism" or "refusal to feed" or "respiratory compromise" or "respiratory problems" or "tongue base edema" or vomiting or emesis or "lethal outcome"))                                            |
| Embase (1974–January 3, 2015)    |                                                                                                                                                                                                                                                                                                                                                                                                                                                                                                                                                                                                                                                                                                                                                                                                                                                                                                                                                                                                                      |
| Medline (1948–January 3, 2015)   |                                                                                                                                                                                                                                                                                                                                                                                                                                                                                                                                                                                                                                                                                                                                                                                                                                                                                                                                                                                                                      |
| Web of Science (January 3, 2015) | (odynophagia OR "anesthetic complications" OR aspiration OR "airway compromise" OR "atlantoaxial dislocation" OR bacteremia OR infection OR bleeding OR death OR dehydration OR distress OR edema OR "Eustachian tube injury" OR fever OR hemorrhage OR hemorrhage OR hypoxia OR infection OR "mandible dislocation" OR "nasopharyngeal insufficiency" OR nausea OR otalgia OR otitis OR pain OR pneumonia OR complications OR "psychological trauma" OR "pulmonary edema" OR "pulmonary embolism" OR "refusal to feed" OR "respiratory compromise" OR "respiratory problems" OR "tongue base edema" OR vomiting OR emesis OR "lethal outcome") AND TOPIC: ("OSA" or "sleep apnea" or "sleep apnoea" or "sleep disordered breathing" or "SDB") AND TOPIC: ("T&A" or "AT" or adenoidectomy or tonsillectomy or tonsillotomy or "tonsil surgery" or adenotonsillectomy) AND TOPIC: (children OR child OR childhood OR pediatric OR pediatric OR adolescent OR adolescents OR "young patient")                          |
| LILACS (January 3, 2015)         | Criança or crianças or niños or niño or infancia or adolescente [Words] and "cirurgia de adenóide" or cirurgia de amígdala" or adenoidectomia or amigdalectomia or amigdalotomia or "cirugía de las amígdalas" [Words] and "apnea do sono" or distúrbios respiratórios do sono" or "apnea del sueño" [Words]                                                                                                                                                                                                                                                                                                                                                                                                                                                                                                                                                                                                                                                                                                         |
| Google Scholar (January 3, 2015) | With all of the words: children<br>With the exact phrase: sleep apnea<br>With at least 1 of the words: adenoidectomy, tonsillectomy, tonsil surgery, adenotonsillectomy<br>Where my words occurs: anywhere in the article<br>60 most relevant hits                                                                                                                                                                                                                                                                                                                                                                                                                                                                                                                                                                                                                                                                                                                                                                   |

**SUPPLEMENTAL TABLE 5** Excluded Articles With Reasons for Exclusion (*n* = 79)

| Source                                | Final Check Reason for Exclusion |
|---------------------------------------|----------------------------------|
| Achar et al <sup>1</sup>              | 5                                |
| de Alcántara et al <sup>2</sup>       | 1                                |
| Al-Mazrou et al <sup>3</sup>          | 1                                |
| Bahamonde et al <sup>4</sup>          | 1                                |
| Beriat <sup>5</sup>                   | 1                                |
| Beriat <sup>6</sup>                   | 1                                |
| Bhattacharjee et al <sup>7</sup>      | 1                                |
| Carr et al <sup>8</sup>               | 1                                |
| Chaidas et al <sup>9</sup>            | 1                                |
| Chang et al <sup>10</sup>             | 1                                |
| Chang et al <sup>11</sup>             | 1                                |
| Chimona et al <sup>12</sup>           | 1                                |
| Coticchia et al <sup>13</sup>         | 1                                |
| Datta et al <sup>14</sup>             | 1                                |
| Deak et al <sup>15</sup>              | 1                                |
| Densert et al <sup>16</sup>           | 1                                |
| Fida and Sendi <sup>17</sup>          | 1                                |
| Friedman et al <sup>18</sup>          | 1                                |
| Gerber et al <sup>19</sup>            | 1                                |
| Grindle et al <sup>20</sup>           | 1                                |
| Hack <sup>21</sup>                    | 1                                |
| Hanss et al <sup>22</sup>             | 4                                |
| Horwood et al <sup>23</sup>           | 1                                |
| Howells et al <sup>24</sup>           | 5                                |
| Hultcrantz et al <sup>25</sup>        | 1                                |
| Hultcrantz and Ericsson <sup>26</sup> | 1                                |
| Hultcrantz et al <sup>27</sup>        | 1                                |
| Ilgen <sup>28</sup>                   | 1                                |
| Jones et al <sup>29</sup>             | 5                                |
| Kalra et al <sup>30</sup>             | 1                                |
| Kamal et al <sup>31</sup>             | 2                                |
| Kemal <sup>32</sup>                   | 1                                |
| Koltai <sup>33</sup>                  | 1                                |
| Konstantinopoulou et al <sup>34</sup> | 5                                |
| Koomson et al <sup>35</sup>           | 1                                |
| Lee et al <sup>36</sup>               | 4                                |
| Liang et al <sup>37</sup>             | 4                                |
| McColley et al <sup>38</sup>          | 4                                |
| McCormick et al <sup>39</sup>         | 4                                |
| Van der Meulen <sup>40</sup>          | 1                                |
| Mitchell and Kelly <sup>41</sup>      | 4                                |
| Mixson et al <sup>42</sup>            | 1                                |
| Moriniere et al <sup>43</sup>         | 1                                |
| Paramasivan et al <sup>44</sup>       | 1                                |
| Peng et al <sup>45</sup>              | 1                                |
| Perkins et al <sup>46</sup>           | 4                                |
| Postma <sup>47</sup>                  | 1                                |
| Prokopakis et al <sup>48</sup>        | 3                                |
| Pruegsanusak et al <sup>49</sup>      | 1                                |
| Rodman et al <sup>50</sup>            | 4                                |
| Rothschild et al <sup>51</sup>        | 4                                |
| Ryu et al <sup>52</sup>               | 1                                |
| Schroeder et al <sup>53</sup>         | 4                                |
| Sdralis and Berkowitz <sup>54</sup>   | 3                                |
| Segal et al <sup>55</sup>             | 1                                |
| Seth et al <sup>56</sup>              | 1                                |
| Shine et al <sup>57</sup>             | 1                                |
| Skilbeck et al <sup>58</sup>          | 1                                |
| Skoulakis et al <sup>59</sup>         | 1                                |

**SUPPLEMENTAL TABLE 5** Continued

| Source                          | Final Check Reason for Exclusion |
|---------------------------------|----------------------------------|
| Slovik et al <sup>60</sup>      | 4                                |
| Solares et al <sup>61</sup>     | 3                                |
| Sonsuwan et al <sup>62</sup>    | 4                                |
| Sorin et al <sup>63</sup>       | 5                                |
| Statham et al <sup>64</sup>     | 4                                |
| Subramanyam et al <sup>65</sup> | 1                                |
| Tauman et al <sup>66</sup>      | 1                                |
| Theilhaber et al <sup>67</sup>  | 4                                |
| Thomas et al <sup>68</sup>      | 4                                |
| Thongyam et al <sup>69</sup>    | 4                                |
| Thottam et al <sup>70</sup>     | 1                                |
| Tom et al <sup>71</sup>         | 4                                |
| Truy et al <sup>72</sup>        | 4                                |
| Tweedie et al <sup>73</sup>     | 1                                |
| Werle et al <sup>74</sup>       | 4                                |
| Wilson et al <sup>75</sup>      | 4                                |
| Wilson et al <sup>76</sup>      | 1                                |
| Windfuhr et al <sup>77</sup>    | 3                                |
| Yilmaz et al <sup>78</sup>      | 4                                |
| Youshani et al <sup>79</sup>    | 4                                |

1 indicates studies with different target condition; 2, studies in adults; 3, reviews, letters, conference abstracts, editorials, case-series studies; 4, studies which the sample included subjects previously diagnosed with genetic syndromic patients, coagulation disorders, or cerebral palsy; 5, studies that did not reveal specifically the 3 first weeks follow-up.

## REFERENCES

- Achar P, Sharma RK, De S, Donne AJ. Does primary indication for tonsillectomy influence post-tonsillectomy haemorrhage rates in children? *Int J Pediatr Otorhinolaryngol*. 2015;79(2):246–250
- de Alcántara LJJ, Pereira RG, Mira JGS, et al. Adenotonsillectomy impact on children's quality of life. *Int Arch Otorhinolaryngol*. 2008;12(2):172–178
- Al-Mazrou KA, Al-Qahtani A, Al-Fayez AI. Effectiveness of transnasal endoscopic powered adenoidectomy in patients with choanal adenoids. *Int J Pediatr Otorhinolaryngol*. 2009;73(12):1650–1652
- Bahamonde HS, Sepulveda JCS, Olavarría CL, Arteaga PJ, Cruzat AC. Comparative study of tonsillectomy with radio-frequency versus traditional technique. *Rev Otorrinolaringol Cir Cabeza Cuello*. 2004;64(2):113–118
- Beriat G. The use of bipolar electrocautery tonsillectomy in patients with pediatric respiratory tract obstruction. *J Clin Anal Med*. 2012;3(1):36–40
- Beriat GK. Microdebrider tonsillotomy in children with obstructive tonsillar hypertrophy. *J Clin Anal Med*. 2013;4(6):462–465
- Bhattacharjee R, Kheirandish-Gozal L, Spruyt K, et al. Adenotonsillectomy out-

comes in treatment of obstructive sleep apnea in children: a multicenter retrospective study. *Am J Respir Crit Care Med*. 2010;182(5):676–683

- Carr MM, Muecke CJ, Sohmer B, Nasser JG, Finley GA. Comparison of postoperative pain: tonsillectomy by blunt dissection or electrocautery dissection. *J Otolaryngol*. 2001;30(1):10–14
- Chaidas KS, Kaditis AG, Papadakis CE, Papandreou N, Koltsidopoulos P, Skoulakis CE. Tonsilloplasty versus tonsillectomy in children with sleep-disordered breathing: short- and long-term outcomes. *Laryngoscope*. 2013;123(5):1294–1299
- Chang KW. Randomized controlled trial of Coblation versus electrocautery tonsillectomy. *Otolaryngology—head and neck surgery: official journal of American Academy of Otolaryngology*. *Head Neck Surg*. 2005;132(2):273–280
- Chang KW. Intracapsular versus subcapsular coblation tonsillectomy. *Otolaryngology—head and neck surgery: official journal of American Academy of Otolaryngology*. *Head Neck Surg*. 2008;138(2):153–157
- Chimona T, Proimos E, Mamoulakis C, Tzanakakis M, Skoulakis CE, Papadakis CE. Multiparametric comparison of cold knife tonsillectomy, radiofrequency excision and thermal welding tonsillectomy in children. *Int J Pediatr Otorhinolaryngol*. 2008;72(9):1431–1436
- Coticchia JM, Yun RD, Nelson L, Koempel J. Temperature-controlled radiofrequency treatment of tonsillar hypertrophy for reduction of upper airway obstruction in pediatric patients. *Arch Otolaryngol Head Neck Surg*. 2006;132(4):425–430
- Datta R, Singh VP, Deshpal. Conventional versus endoscopic powered adenoidectomy: A comparative study. *Med J Armed Forces India*. 2009;65(4):308–312
- Deak L, Saxton D, Johnston K, Benedek P, Katona G. Comparison of Postoperative Pain in Children with Two Intracapsular Tonsillotomy Techniques and a Standard Tonsillectomy: Microdebrider and radio-frequency tonsillotomies versus standard tonsillectomies. *Sultan Qaboos Univ Med J*. 2014;14(4):e500–e505
- Densert O, Desai H, Eliasson A, et al. Tonsillotomy in children with tonsillar hypertrophy. *Acta Otolaryngol*. 2001;121(7):854–858
- Fida AR, Sendi KS. Assessment of postoperative pain scores in thermal welding and conventional tonsillectomy techniques: A randomized control study. *Egyptian Journal of Ear, Nose, Throat and Allied Sciences*. 2013;14(2):107–111

18. Friedman M, LoSavio P, Ibrahim H, Ramakrishnan V. Radiofrequency tonsil reduction: safety, morbidity, and efficacy. *Laryngoscope*. 2003;113(5):882–887
19. Gerber ME, O'Connor DM, Adler E, Myer CM III. Selected risk factors in pediatric adenotonsillectomy. *Arch Otolaryngol Head Neck Surg*. 1996;122(8):811–814
20. Grindle CR, Murray RC, Chennupati SK, Barth PC, Reilly JS. Incidence of revision adenoidectomy in children. *Laryngoscope*. 2011;121(10):2128–2130
21. Hack H. An audit of the use of an opiate sparing, multimodal analgesic regime in children with Sleep Disordered Breathing/Obstructive Sleep Apnoea undergoing adenotonsillectomy. *Int J Pediatr Otorhinolaryngol*. 2014;78(1):119–123
22. Hanss J, Nowak C, Decaux A, Penon C, Bobin S. Outpatient tonsillectomy in children: a 7-year experience. *Eur Ann Otorhinolaryngol Head Neck Dis*. 2011;128(6):283–289
23. Horwood L, Nguyen LH, Brown K, Paci P, Constantin E. African American ethnicity as a risk factor for respiratory complications following adenotonsillectomy. *JAMA Otolaryngol Head Neck Surg*. 2013;139(2):147–152
24. Howells RC II, Wax MK, Ramadan HH. Value of preoperative prothrombin time/partial thromboplastin time as a predictor of postoperative hemorrhage in pediatric patients undergoing tonsillectomy. *Head Neck Surg*. 1997;117(6):628–632
25. Hultcrantz E, Linder A, Markström A. Tonsillectomy or tonsillotomy?—A randomized study comparing postoperative pain and long-term effects. *Int J Pediatr Otorhinolaryngol*. 1999;51(3):171–176
26. Hultcrantz E, Ericsson E. Pediatric tonsillectomy with the radiofrequency technique: less morbidity and pain. *Laryngoscope*. 2004;114(5):871–877
27. Hultcrantz E, Linder A, Markström A. Long-term effects of intracapsular partial tonsillectomy (tonsillotomy) compared with full tonsillectomy. *Int J Pediatr Otorhinolaryngol*. 2005;69(4):463–469
28. Ilgen F. [Laser-assisted tonsillotomy in children with obstructive sleep apnea and adenotonsillary hyperplasia—experiences as an outpatient procedure]. *Laryngorhinootologie*. 2005;84(9):665–670
29. Jones DT, Yoon MJ, Licameli G. Effectiveness of postoperative follow-up telephone interviews for patients who underwent adenotonsillectomy: a retrospective study. *Arch Otolaryngol Head Neck Surg*. 2007;133(11):1091–1095
30. Kalra M, Buncher R, Amin RS. Asthma as a risk factor for respiratory complications after adenotonsillectomy in children with obstructive breathing during sleep. *Ann Allergy Asthma Immunol*. 2005;94(5):549–552
31. Kamal SA, Basu S, Kapoor L, Kulandaivelu G, Talpalikar S, Papasthatis D. Harmonic scalpel tonsillectomy: a prospective study. *Eur Arch Otorhinolaryngol*. 2006;263(5):449–454
32. Kemal O. Harmonic scalpel versus bipolar tonsillectomy: a double-blind clinical trial. *Eur Arch Otorhinolaryngol*. 2012;269(5):1533–1536
33. Koltai PJ. Powered intracapsular tonsillectomy: for pediatric tonsillar hypertrophy. *Int Congr Ser*. 2003;1257:41–45
34. Konstantinopoulou S, Gallagher P, Elden L, et al. Complications of adenotonsillectomy for obstructive sleep apnea in school-aged children. *Int J Pediatr Otorhinolaryngol*. 2015;79(2):240–245
35. Koomson A, Morin I, Brouillette R, Brown KA. Children with severe OSAS who have adenotonsillectomy in the morning are less likely to have postoperative desaturation than those operated in the afternoon. *Can J Anaesth*. 2004;51(1):62–67
36. Lee TT, Lefebvre CE, Gans NE, Daniel SJ. Quantifying respiratory complications post-adenotonsillectomy in patients with normal or inconclusive overnight oximetry. *J Otolaryngol Head Neck Surg*. 2013;42:50
37. Liang C, Ruiz AG, Jensen EL, Friedman NR. Indications, clinical course, and postoperative outcomes of urgent adenotonsillectomy in children. *JAMA Otolaryngol Head Neck Surg*. 2015;141(3):236–244
38. McColley SA, April MM, Carroll JL, Naclerio RM, Loughlin GM. Respiratory compromise after adenotonsillectomy in children with obstructive sleep apnea. *Arch Otolaryngol Head Neck Surg*. 1992;118(9):940–943
39. McCormick ME, Sheyn A, Hauptert M, Thomas R, Folbe AJ. Predicting complications after adenotonsillectomy in children 3 years old and younger. *Int J Pediatr Otorhinolaryngol*. 2011;75(11):1391–1394
40. Lowe D, van der Meulen J; National Prospective Tonsillectomy Audit. Tonsillectomy technique as a risk factor for postoperative haemorrhage. *Lancet*. 2004;364(9435):697–702
41. Mitchell RB, Kelly J. Outcome of adenotonsillectomy for obstructive sleep apnea in children under 3 years. *Head Neck Surg*. 2005;132(5):681–684
42. Mixson CM, Weinberger PM, Austin MB. Comparison of microdebrider subcapsular tonsillectomy to harmonic scalpel and electrocautery total tonsillectomy. *Am J Otolaryngol*. 2007;28(1):13–17
43. Morinière S, Roux A, Bakhos D, et al. Radiofrequency tonsillotomy versus bipolar scissors tonsillectomy for the treatment of OSAS in children: a prospective study. *Eur Ann Otorhinolaryngol Head Neck Dis*. 2013;130(2):67–72
44. Paramasivan VK, Arumugam SV, Kameswaran M. Randomised comparative study of adenotonsillectomy by conventional and coblation method for children with obstructive sleep apnoea. *Int J Pediatr Otorhinolaryngol*. 2012;76(6):816–821
45. Peng A, Dodson KM, Thacker LR, Kierce J, Shapiro J, Baldassari CM. Use of laryngeal mask airway in pediatric adenotonsillectomy. *Arch Otolaryngol Head Neck Surg*. 2011;137(1):42–46
46. Perkins JA, Sie K, Gray S. Presence of 22q11 deletion in postadenoidectomy velopharyngeal insufficiency. *Arch Otolaryngol Head Neck Surg*. 2000;126(5):645–648
47. Postma DS, Folsom F. The case for an outpatient “approach” for all pediatric tonsillectomies and/or adenoidectomies: a 4-year review of 1419 cases at a community hospital. *Otolaryngol Head Neck Surg*. 2002;127(1):101–108
48. Prokopakis EP, Lachanas VA, Benakis AA, Helidonis ES, Velegrakis GA. Tonsillectomy using the Ligasure vessel sealing system. A preliminary report. *Int J Pediatr Otorhinolaryngol*. 2005;69(9):1183–1186
49. Pruegsanusak K, Wongsuwan K, Wongkittithawon J. A randomized controlled trial for perioperative morbidity in microdebrider versus cold instrument dissection tonsillectomy. *J Med Assoc Thai*. 2010;93(5):558–565
50. Rodman R, Boehnke M, Venkatesan N, Pine H. Discharge after tonsillectomy in pediatric sleep apnea patients. *Int J Pediatr Otorhinolaryngol*. 2013;77(5):682–685
51. Rothschild MA, Catalano P, Biller HF. Ambulatory pediatric tonsillectomy and the identification of high-risk subgroups. *Otolaryngology—head and neck surgery: official journal of American Academy of Otolaryngology—Head Neck Surg*. 1994;110(2):203–210
52. Ryu YJ, Wee JH, Lee WH, Rhee J, Kim JW. Combined extracapsular and intracapsular tonsillectomy: lower pole capsule preservation. *Laryngoscope*. 2014;124(7):1557–1561
53. Schroeder JW Jr, Anstead AS, Wong H. Complications in children who electively remain intubated after adenotonsillectomy for severe obstructive sleep apnea. *Int J Pediatr Otorhinolaryngol*. 2009;73(8):1095–1099
54. Sdrails T, Berkowitz RG. Early adenotonsillectomy for relief of acute upper airway obstruction due to acute tonsillitis in children. *Int J Pediatr Otorhinolaryngol*. 1996;35(1):25–29
55. Segal N, Puterman M, Rotem E, et al. A prospective randomized double-blind trial

- of fibrin glue for reducing pain and bleeding after tonsillectomy. *Int J Pediatr Otorhinolaryngol.* 2008;72(4):469–473
56. Sethi N, Egan P, Ward VM. Suction diathermy adenoidectomy performed in the district general hospital. *J Laryngol Otol.* 2014;128(1):78–81
  57. Shine NP, Coates HL, Lannigan FJ, Duncan AW. Adenotonsillar surgery in morbidly obese children: routine elective admission of all patients to the intensive care unit is unnecessary. *Anaesth Intensive Care.* 2006;34(6):724–730
  58. Skilbeck CJ, Tweedie DJ, Lloyd-Thomas AR, Albert DM. Suction diathermy for adenoidectomy: complications and risk of recurrence. *Int J Pediatr Otorhinolaryngol.* 2007;71(6):917–920
  59. Skoulakis CE, Papadakis CE, Manios AG, Moshotzopoulos PD, Theos EA, Valagiannis DE. Tonsilloplasty in children with obstructive symptoms. *J Otolaryngol.* 2007;36(4):240–246
  60. Slovik Y, Tal A, Shapira Y, Tarasiuk A, Leiberman A. Complications of adenotonsillectomy in children with OSAS younger than 2 years of age. *Int J Pediatr Otorhinolaryngol.* 2003;67(8):847–851
  61. Solares CA, Koempel JA, Hirose K, et al. Safety and efficacy of powered intracapsular tonsillectomy in children: a multicenter retrospective case series. *Int J Pediatr Otorhinolaryngol.* 2005;69(1):21–26
  62. Sonsuwan N, Pornlert A, Sawanyawisuth K. Risk factors for acute pulmonary edema after adenotonsillectomy in children. *Auris Nasus Larynx.* 2014;41(4):373–375
  63. Sorin A, Bent JP, April MM, Ward RF. Complications of microdebrider-assisted powered intracapsular tonsillectomy and adenoidectomy. *Laryngoscope.* 2004;114(2):297–300
  64. Statham MM, Elluru RG, Buncher R, Kalra M. Adenotonsillectomy for obstructive sleep apnea syndrome in young children: prevalence of pulmonary complications. *Arch Otolaryngol Head Neck Surg.* 2006;132(5):476–480
  65. Subramanyam R, Varughese A, Willging JP, Sadhasivam S. Future of pediatric tonsillectomy and perioperative outcomes. *Int J Pediatr Otorhinolaryngol.* 2013;77(2):194–199
  66. Tauman R, Gulliver TE, Krishna J, et al. Persistence of obstructive sleep apnea syndrome in children after adenotonsillectomy. *J Pediatr.* 2006;149(6):803–808
  67. Theilhaber M, Arachchi S, Armstrong DS, Davey MJ, Nixon GM. Routine post-operative intensive care is not necessary for children with obstructive sleep apnea at high risk after adenotonsillectomy. *Int J Pediatr Otorhinolaryngol.* 2014;78(5):744–747
  68. Thomas K, Boeger D, Buentzel J, et al. Pediatric adenoidectomy: a population-based regional study on epidemiology and outcome. *Int J Pediatr Otorhinolaryngol.* 2013;77(10):1716–1720
  69. Thongyam A, Marcus CL, Lockman JL, et al. Predictors of perioperative complications in higher risk children after adenotonsillectomy for obstructive sleep apnea: a prospective study. *Otolaryngology-head and neck surgery: official journal of American Academy of Otolaryngology-Head Neck Surg.* 2014;151(6):1046–1054
  70. Thottam PJ, Christenson JR, Cohen DS, Metz CM, Saraiya SS, Hauptert MS. The utility of common surgical instruments for pediatric adenotonsillectomy. *Laryngoscope.* 2015;125(2):475–479
  71. Tom LW, DeDio RM, Cohen DE, Wetmore RF, Handler SD, Potsic WP. Is outpatient tonsillectomy appropriate for young children? *Laryngoscope.* 1992;102(3):277–280
  72. Truy E, Merad F, Robin P, Fantino B, Morgon A. Failures in outpatient tonsillectomy policy in children: a retrospective study in 311 children. *Int J Pediatr Otorhinolaryngol.* 1994;29(1):33–42
  73. Tweedie DJ, Skilbeck CJ, Lloyd-Thomas AR, Albert DM. The nasopharyngeal prong airway: an effective post-operative adjunct after adenotonsillectomy for obstructive sleep apnoea in children. *Int J Pediatr Otorhinolaryngol.* 2007;71(4):563–569
  74. Werle AH, Nicklaus PJ, Kirse DJ, Bruegger DE. A retrospective study of tonsillectomy in the under 2-year-old child: indications, perioperative management, and complications. *Int J Pediatr Otorhinolaryngol.* 2003;67(5):453–460
  75. Wilson K, Lakheeram I, Morielli A, Brouillette R, Brown K. Can assessment for obstructive sleep apnea help predict postadenotonsillectomy respiratory complications? *Anesthesiology.* 2002;96(2):313–322
  76. Wilson YL, Merer DM, Moscatello AL. Comparison of three common tonsillectomy techniques: a prospective randomized, double-blinded clinical study. *Laryngoscope.* 2009;119(1):162–170
  77. Windfuhr JP. Lethal post-tonsillectomy hemorrhage. *Auris Nasus Larynx.* 2003;30(4):391–396
  78. Yilmaz M, Duzlu M, Catli T, Ustun S, Ceylan A. Thermal welding versus cold knife tonsillectomy: a prospective randomized study. *Kaohsiung J Med Sci.* 2012;28(5):270–272
  79. Youshani AS, Thomas L, Sharma RK. Day case tonsillectomy for the treatment of obstructive sleep apnoea syndrome in children: Alder Hey experience. *Int J Pediatr Otorhinolaryngol.* 2011;75(2):207–210

**SUPPLEMENTAL MATERIAL: RISK OF BIAS ASSESSED BY META-ANALYSIS OF STATISTICS ASSESSMENT AND REVIEW INSTRUMENT CRITICAL APPRAISAL TOOLS. RISK OF BIAS WAS CATEGORIZED AS HIGH WHEN THE STUDY REACHES UP TO 49% SCORE “YES,” MODERATE WHEN THE STUDY REACHED 50% TO 69% SCORE “YES,” AND LOW WHEN THE STUDY REACHED MORE THAN 70% SCORE “YES.”**

**SUPPLEMENTAL TABLE 6** Experimental Studies

| Question                                                                            | Answer                    |                          |                             |
|-------------------------------------------------------------------------------------|---------------------------|--------------------------|-----------------------------|
|                                                                                     | Nixon et al <sup>23</sup> | Riaz et al <sup>13</sup> | Sanders et al <sup>12</sup> |
| 1. Was the assignment to treatment groups random?                                   | N                         | N                        | N                           |
| 2. Were participants blinded to treatment allocation?                               | NA                        | NA                       | NA                          |
| 3. Was allocation to treatment groups concealed from the allocator?                 | Y                         | U                        | Y                           |
| 4. Were the outcomes of people who withdrew described and included in the analysis? | NA                        | U                        | Y                           |
| 5. Were those assessing outcomes blind to the treatment allocation?                 | U                         | U                        | N                           |
| 6. Were the control and treatment groups comparable at entry?                       | Y                         | Y                        | Y                           |
| 7. Were groups treated identically other than for the named interventions?          | N                         | Y                        | Y                           |
| 8. Were outcomes measured in the same way for all groups?                           | Y                         | Y                        | Y                           |
| 9. Were outcomes measured in a reliable way?                                        | Y                         | Y                        | Y                           |
| 10. Was appropriate statistical analysis used?                                      | Y                         | Y                        | Y                           |
| % Yes/risk                                                                          | 50/moderate               | 50/moderate              | 70/low                      |

N, no; NA, not applicable; U, unclear; Y, yes.

**SUPPLEMENTAL TABLE 7** Observational Studies

| Question                                                                            | Answer                    |                             |                     |                                     |                            |                            |                             |                        |                                    |                                       |                             |
|-------------------------------------------------------------------------------------|---------------------------|-----------------------------|---------------------|-------------------------------------|----------------------------|----------------------------|-----------------------------|------------------------|------------------------------------|---------------------------------------|-----------------------------|
|                                                                                     | Ahmad et al <sup>26</sup> | Baguley et al <sup>32</sup> | Brown <sup>24</sup> | Del-Rio Camacho et al <sup>16</sup> | Hadden et al <sup>28</sup> | Hamada et al <sup>38</sup> | Lalakea et al <sup>22</sup> | Ma et al <sup>33</sup> | Muninnobpamasa et al <sup>29</sup> | Onotai and Lilly-Tariah <sup>31</sup> | Perkins et al <sup>15</sup> |
| 1. Was the study based on a random or pseudorandom sample?                          | N                         | N                           | N                   | N                                   | Y                          | N                          | Y                           | N                      | N                                  | N                                     | N                           |
| 2. Were the criteria for inclusion in the sample clearly defined?                   | Y                         | Y                           | Y                   | Y                                   | Y                          | Y                          | Y                           | Y                      | Y                                  | Y                                     | Y                           |
| 3. Were confounding factors identified and strategies to deal with them stated?     | Y                         | U                           | Y                   | Y                                   | Y                          | Y                          | Y                           | Y                      | Y                                  | U                                     | N                           |
| 4. Were outcomes assessed by using objective criteria?                              | Y                         | Y                           | Y                   | Y                                   | Y                          | Y                          | Y                           | Y                      | Y                                  | Y                                     | Y                           |
| 5. If comparisons are being made, was there sufficient description of the groups?   | NA                        | NA                          | Y                   | NA                                  | Y                          | Y                          | NA                          | Y                      | NA                                 | NA                                    | Y                           |
| 6. Was the follow-up carried out over a sufficient time period?                     | Y                         | Y                           | Y                   | Y                                   | Y                          | Y                          | Y                           | Y                      | Y                                  | Y                                     | Y                           |
| 7. Were the outcomes of people who withdrew described and included in the analysis? | NA                        | NA                          | Y                   | NA                                  | NA                         | NA                         | Y                           | N                      | NA                                 | NA                                    | Y                           |
| 8. Were the outcomes measured in a reliable way?                                    | Y                         | Y                           | Y                   | Y                                   | Y                          | Y                          | Y                           | Y                      | Y                                  | Y                                     | Y                           |
| 9. Was an appropriate statistical analysis used?                                    | N                         | Y                           | Y                   | Y                                   | Y                          | Y                          | N                           | Y                      | N                                  | N                                     | Y                           |
| % Yes/risk                                                                          | 55.55/moderate            | 55.55/moderate              | 88.88/low           | 66.66/moderate                      | 88.88/low                  | 77.77/low                  | 77.77/low                   | 77.77/low              | 55.55/moderate                     | 44.44/high                            | 77.77/low                   |

N, no; NA, not applicable; U, unclear; Y, yes.

| Rakover et al <sup>36</sup> | Ruboyanes <sup>19</sup> | Shakeel et al <sup>39</sup> | Shott et al <sup>35</sup> | Spencer and Jones <sup>30</sup> | Vlastos et al <sup>27</sup> | Wang et al <sup>25</sup> | Wong et al <sup>37</sup> | Ye et al <sup>34</sup> |
|-----------------------------|-------------------------|-----------------------------|---------------------------|---------------------------------|-----------------------------|--------------------------|--------------------------|------------------------|
| N                           | N                       | N                           | N                         | N                               | N                           | N                        | N                        | N                      |
| Y                           | Y                       | Y                           | Y                         | Y                               | Y                           | U                        | U                        | Y                      |
| N                           | U                       | Y                           | N                         | N                               | Y                           | U                        | N                        | Y                      |
| Y                           | Y                       | Y                           | Y                         | Y                               | Y                           | Y                        | Y                        | Y                      |
| NA                          | NA                      | Y                           | NA                        | NA                              | Y                           | NA                       | NA                       | NA                     |
| Y                           | Y                       | Y                           | Y                         | Y                               | Y                           | Y                        | Y                        | Y                      |
| NA                          | NA                      | NA                          | NA                        | Y                               | N                           | NA                       | NA                       | NA                     |
| Y                           | Y                       | Y                           | Y                         | Y                               | Y                           | U                        | U                        | Y                      |
| N                           | N                       | Y                           | N                         | N                               | Y                           | N                        | N                        | Y                      |
| 44.44 /high                 | 44.44/high              | 77.77/low                   | 44.44/high                | 55.55/moderate                  | 77.77/low                   | 22.22/high               | 22.22/high               | 66.66/moderate         |
